# Supplementary material for: A Machine Learning Framework for Detecting COVID-19 Infection Using Surface-Enhanced Raman Scattering
Source: MDPI journal article supplement (doi:10.3390/bios12080589), 2022-08-02
Supplement: s1 [file s1]

# A machine learning framework for detecting COVID-19 infection using surface-enhanced Raman scattering

Eloghosa Ikponmwoba<sup>1</sup>, Okezzi Ukorigho<sup>1</sup>, Parikshit Moitra<sup>2,3</sup>, Dipanjan Pan<sup>2,3</sup>, Manas Ranjan Gartia<sup>1,\*</sup>, Opeoluwa Owoyele<sup>1,\*</sup>

<sup>1</sup> Department of Mechanical and Industrial Engineering, Louisiana State University, Baton Rouge, Louisiana, 70803, United States; eikpon1@lsu.edu (E.I.); oukori1@lsu.edu (O.U.); mgartia@lsu.edu (M.G.); owoyele@lsu.edu (O.O.).

<sup>2</sup> Department of Pediatrics, Center for Blood Oxygen Transport and Hemostasis, University of Maryland Baltimore School of Medicine, Baltimore, Maryland 21201, USA

<sup>3</sup> Department of Nuclear Engineering, The Pennsylvania State University, University Park, Pennsylvania 16802, USA; pxm5519@psu.edu (P.M.); dipanjan@psu.edu (D.P.).

\* Correspondence: MR: mgartia@lsu.edu; OO : owoyele@lsu.edu

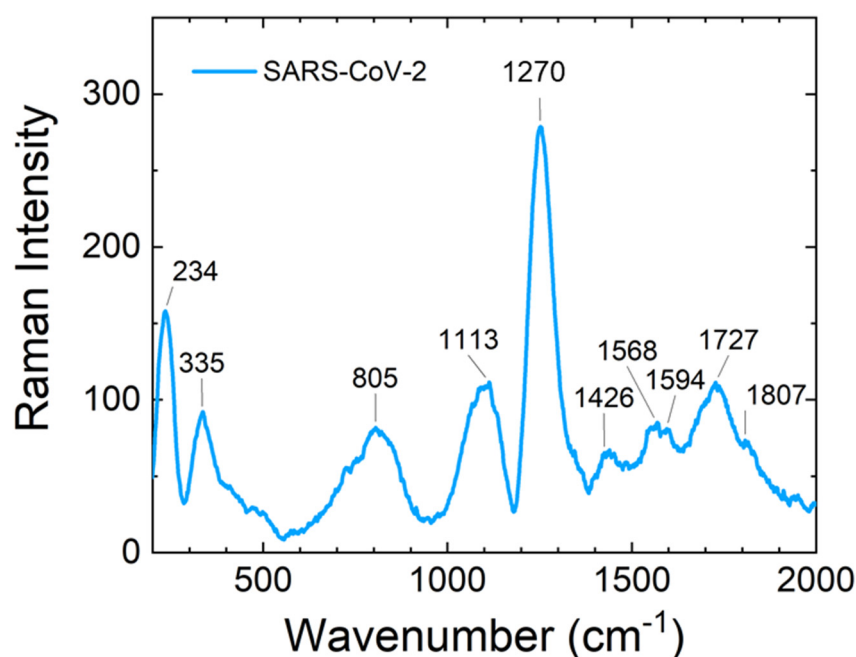

**Figure S1.** Raman spectra of SARS-CoV-2 RNA.

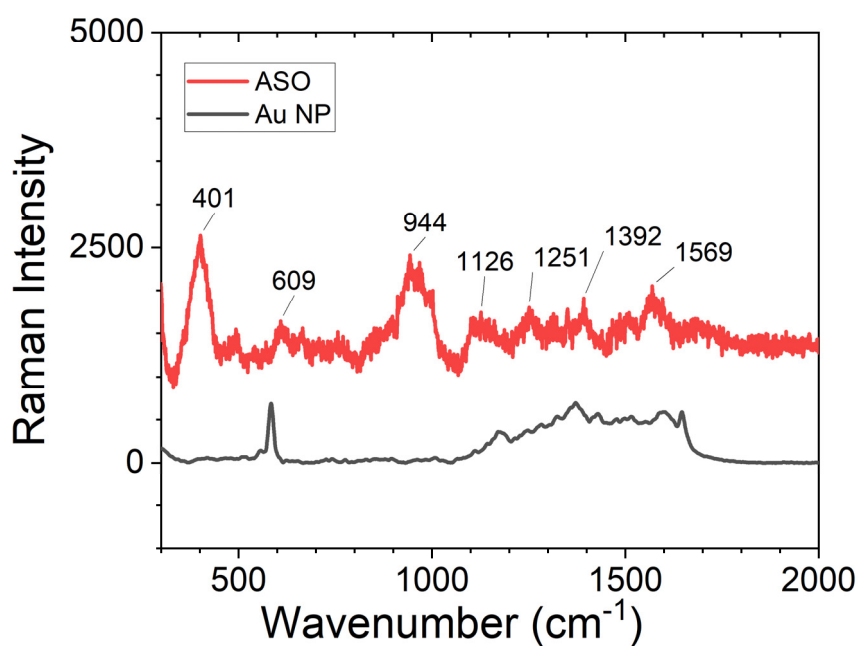

**Figure S2.** Raman spectra of Au NP and ASO.

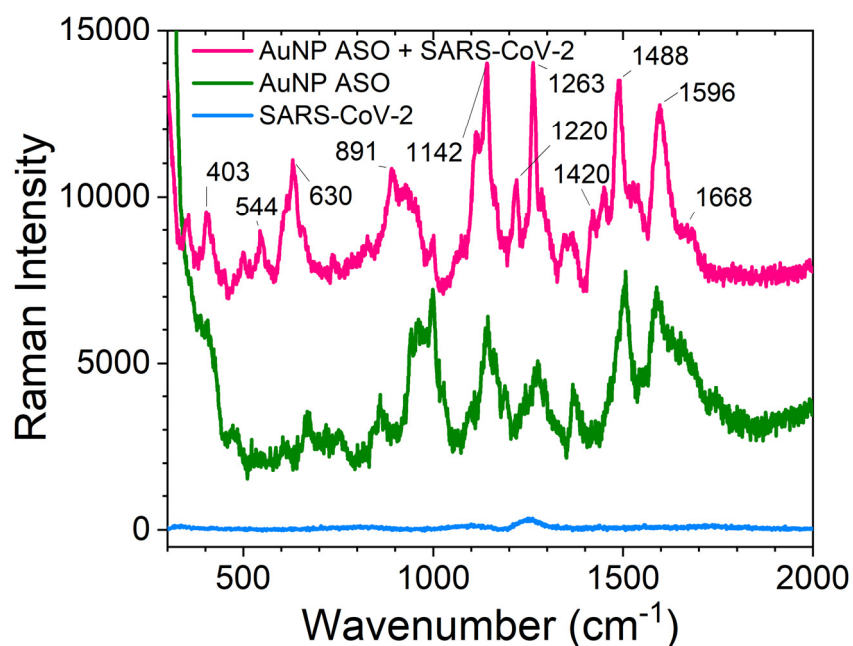

**Figure S3.** SERS spectra of Au-ASO, and Au-ASO-SARS-CoV-2 RNA. To compare the relative enhancement in SERS, the Raman spectra of SARS-CoV-2 is also included in the figure.
